# Supplementary material for: Protective Effects of Cannabidiol on Chemotherapy‐Induced Oral Mucositis via the Nrf2/Keap1/ARE Signaling Pathways
Source: Hindawi journal article supplement (doi:10.1155/2022/4619760), 2022-01-01

Figure S4

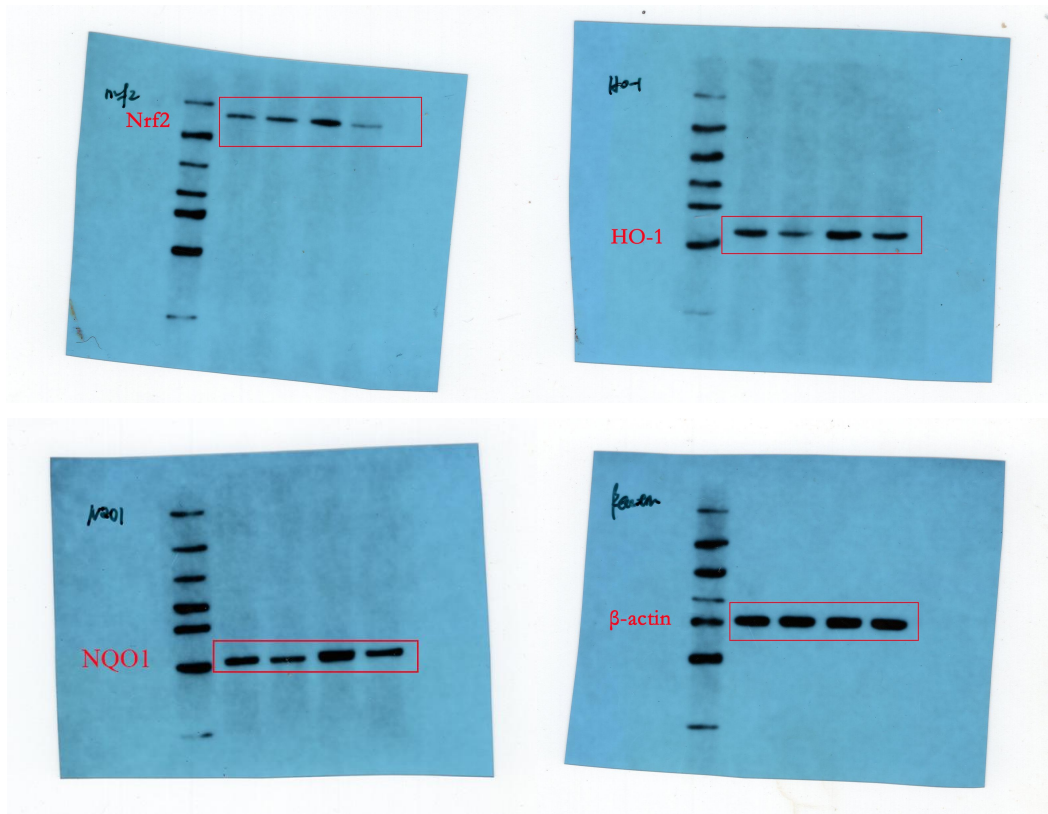

Supplement: f4 [file 4619760.f4.pdf]
